# Supplementary material for: Synthesis of Carrier-Free Paclitaxel–Curcumin Nanoparticles: The Role of Curcuminoids
Source: MDPI journal article supplement (doi:10.3390/bioengineering9120815), 2022-12-18
Supplement: s1 [file s1]

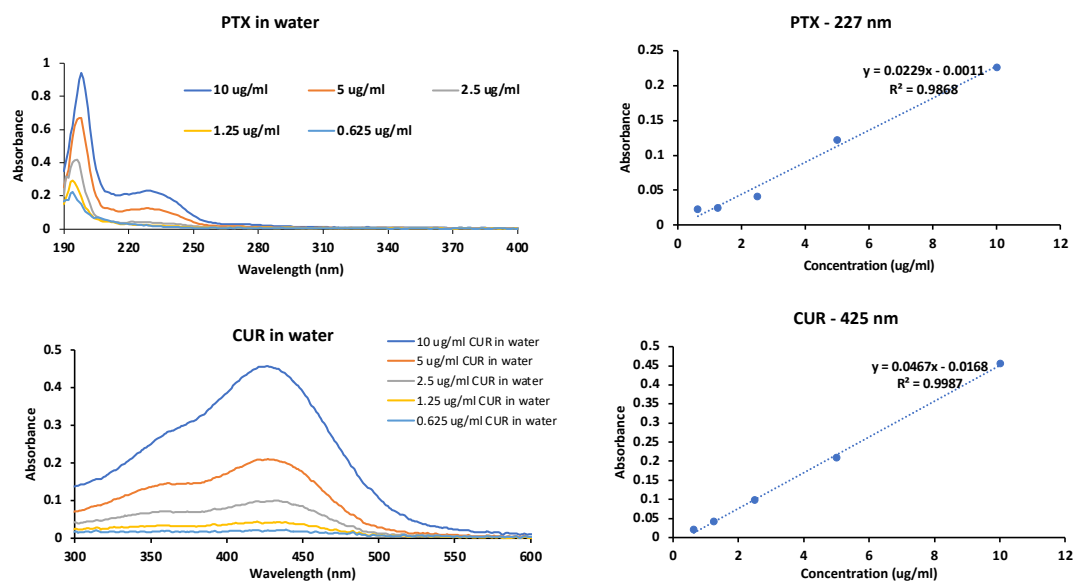

**Figure S1.** UV-Vis spectra of PTX and CUR molecules in water at different concentrations and the resulting standard curves. PTX and CUR stand for paclitaxel and curcumin.

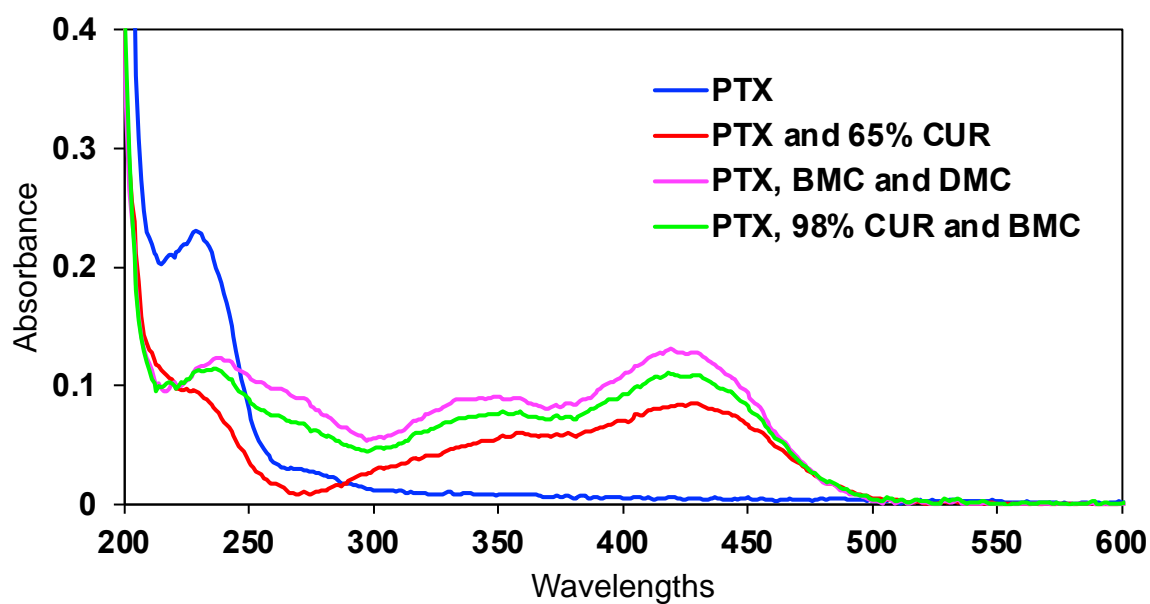

**Figure S2.** The UV-Vis absorption spectra of free PTX and the synthesized NPs from mixtures of PTX and 65% CUR (1), PTX, BMC and DMC (5), PTX, 98% CUR and BMC (6). PTX, CUR, BMC and DMC stand for paclitaxel, curcumin, bisdemethoxycurcumin and demethoxycurcumin, respectively.
